# Supplementary material for: Cachexia and Sarcopenia in Oligometastatic Non-Small Cell Lung Cancer: Making a Potential Curable Disease Incurable?
Source: MDPI journal article supplement (doi:10.3390/cancers16010230), 2024-01-04
Supplement: s1 [file s1]

**Table S1b.** Toxicities in patients with sOMD NSCLC with the intention of radical treatment

| Toxicity                      | Grade 1 | Grade 2 | Grade 3 | Grade 4 | Grade 5 |
|-------------------------------|---------|---------|---------|---------|---------|
| Alopecia                      |         | 1       |         |         |         |
| Anemia                        |         |         | 18      | 2       |         |
| Arterial injury               |         |         | 1       |         |         |
| Arterial thromboembolism      |         | 1       |         |         |         |
| Bone pain                     |         |         | 1       |         |         |
| Bronchial obstruction         |         |         |         | 1       |         |
| Chest pain                    |         |         | 1       | 1       |         |
| Colitis                       |         | 1       |         |         |         |
| Chronic kidney disease        |         |         | 4       |         |         |
| Cystitis                      | 1       | 1       |         |         |         |
| Delirium                      |         |         | 1       |         |         |
| Diarrhea                      | 2       | 1       | 2       |         |         |
| Duodenal ulcer                |         |         | 1       |         |         |
| Dysphasia                     |         |         | 1       |         |         |
| Edema cerebral                |         |         |         |         | 1       |
| Epistaxis                     | 1       |         |         |         |         |
| Fatigue                       | 2       | 2       | 1       |         |         |
| Febrile neutropenia           |         | 2       | 10      | 1       | 1       |
| Fever                         | 1       | 2       | 4       | 1       |         |
| Gastritis                     |         |         | 1       |         |         |
| Gingival pain                 |         |         | 1       |         |         |
| Guillan-Barre syndrome        |         |         |         | 1       |         |
| Hearing impaired              |         | 1       |         |         |         |
| Heart failure                 |         |         | 1       |         |         |
| Hepatitis                     |         | 2       | 3       |         |         |
| Herpes simplex reactivation   |         | 1       |         |         |         |
| Hypotension                   |         |         | 1       |         |         |
| Hypothyroidism                |         | 2       |         |         |         |
| Laryngitis                    |         | 1       |         |         |         |
| Lung infection                |         | 2       | 3       |         |         |
| Malaise                       |         | 1       | 6       |         |         |
| Mucositis oral                |         | 1       |         |         |         |
| Nausea                        | 1       | 5       | 2       |         |         |
| Peripheral motor neuropathy   |         | 1       |         |         |         |
| Peripheral sensory neuropathy |         | 1       | 1       |         |         |
| Pleural effusion              |         | 1       |         |         |         |
| Pneumonitis                   |         | 1       | 1       |         |         |
| Pneumothorax                  |         | 2       | 1       |         |         |
| Radiation esophagitis         |         | 3       | 4       |         |         |
| Radiation pneumonitis         |         | 5       | 3       |         |         |
| Rash pustular                 | 1       | 4       | 1       |         |         |
| Subcutaneous emphysema        |         |         | 1       |         |         |
| Thromboembolic event          |         | 3       | 6       |         |         |
