# Supplementary material for: Cachexia and Sarcopenia in Oligometastatic Non-Small Cell Lung Cancer: Making a Potential Curable Disease Incurable?
Source: MDPI journal article supplement (doi:10.3390/cancers16010230), 2024-01-04
Supplement: s1 [file s1]

**Table S1a.** Toxicities in patients with the intention of radical treatment stratified by cachexia and sarcopenia.

| Grading | A: No cachexia and no sarcopenia (n=133) | B: Cachexia, no sarcopenia (n=46) | C: Sarcopenia, no cachexia (n=34) | D: Cachexia and sarcopenia (n=21) | P value |
|---------|------------------------------------------|-----------------------------------|-----------------------------------|-----------------------------------|---------|
| 1       | 6                                        | 2                                 | 1                                 | 0                                 | 0.78    |
| 2       | 27                                       | 11                                | 4                                 | 8                                 | 0.13    |
| 3       | 43                                       | 18                                | 13                                | 6                                 | 0.74    |
| 4       | 4                                        | 0                                 | 0                                 | 2                                 | 0.10    |
| 5       | 2                                        | 0                                 | 0                                 | 0                                 | 0.68    |
